# Supplementary material for: Summertime response of ozone and fine particulate matter to mixing layer meteorology over the North China Plain
Source: Copernicus journal article supplement (doi:10.5194/acp-23-14715-2023), 2023-11-29
Supplement: Supplementary file 1 [file acp-23-14715-2023-supplement.pdf]

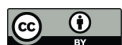

*Supplement of*

## **Summertime response of ozone and fine particulate matter to mixing layer meteorology over the North China Plain**

**Jiaqi Wang et al.**

*Correspondence to:* Jian Gao ([gaojian@craes.org.cn](mailto:gaojian@craes.org.cn)) and Haisheng Li ([lihs@craes.org.cn](mailto:lihs@craes.org.cn))

The copyright of individual parts of the supplement might differ from the article licence.

**Table S1** List of observation stations and locations.

| No. | Site         | Abbreviation | Station                                               | longitude<br>(° E) | latitude<br>(° N) |
|-----|--------------|--------------|-------------------------------------------------------|--------------------|-------------------|
| 1   | BeiJing      | BeiJ         | China National<br>Environmental Monitoring<br>Centre  | 116.41             | 40.04             |
| 2   | Tianjin      | TianJ        | Zhongshan North Road<br>Station                       | 117.21             | 39.17             |
| 3   | Shijiazhuang | SJZ          | Northwest Shuiyuan Station                            | 114.49             | 38.13             |
| 4   | Langfang     | LangF        | Langfang Hebei University<br>of Technology Station    | 116.70             | 39.55             |
| 5   | Baoding      | BaoD         | Yangguang North Street<br>Station                     | 115.48             | 38.93             |
| 6   | Tangshan     | TangS        | Xiaoshan Station                                      | 118.19             | 39.62             |
| 7   | Handan       | HanD         | Guangming South Street<br>Station                     | 114.50             | 36.57             |
| 8   | Hengshui     | HengS        | Hengshui Ecology and<br>Environment Bureau<br>Station | 115.68             | 37.73             |
| 9   | Xingtai      | XingT        | Quanbei Street Station                                | 114.53             | 37.09             |
| 10  | Cangzhou     | CangZ        | Cangzhou Technical<br>College Station                 | 116.82             | 38.28             |
| 11  | Taiyuan      | TaiY         | Taiyuan Jinyuan Station                               | 112.48             | 37.71             |
| 12  | Yangquan     | YangQ        | Nanzhuang Road Station                                | 113.59             | 37.85             |
| 13  | Changzhi     | ChangZ       | Changzhi Ecology and<br>Environment Bureau<br>Station | 113.11             | 36.20             |
| 14  | Jincheng     | JinC         | Jincheng Ecology and<br>Environment Bureau<br>Station | 112.86             | 35.49             |
| 15  | Jinan        | JiNan        | Jinan Environmental<br>Monitoring Station             | 117.06             | 36.66             |
| 16  | Zibo         | ZiB          | Beijing Road station                                  | 117.91             | 36.84             |
| 17  | Jining       | JiNing       | Jinyu Road Station                                    | 116.63             | 35.43             |
| 18  | Dezhou       | DeZ          | Baima Lake Station                                    | 115.83             | 36.95             |
| 19  | Liaocheng    | LiaoC        | Liaocheng monitoring<br>center Station                | 115.98             | 36.50             |
| 20  | Binzhou      | BinZ         | Binzhou Ecology and<br>Environment Bureau<br>Station  | 118.01             | 37.38             |
| 21  | Heze         | HeZ          | Heze Quality Supervision                              | 115.53             | 35.21             |

| Bureau Station |           |        |                                                 |        |       |
|----------------|-----------|--------|-------------------------------------------------|--------|-------|
| 22             | Zhengzhou | ZhengZ | Zhengzhou Forty-seven Middle School Station     | 113.74 | 34.77 |
| 23             | Kaifeng   | KaiF   | Jinming West Street Station                     | 114.30 | 34.80 |
| 24             | Anyang    | AnY    | Anyang Ecology and Environment Bureau Station   | 114.40 | 36.09 |
| 25             | Hebi      | HeB    | Hebi Ecology and Environment Bureau Station     | 114.29 | 35.72 |
| 26             | Xinxiang  | XinX   | Xinxiang Ecology and Environment Bureau Station | 113.92 | 35.30 |
| 27             | Jiaozuo   | JiaoZ  | Fengshou Middle Road Station                    | 113.28 | 35.21 |
| 28             | Puyang    | PuY    | Jinti Road Station                              | 115.04 | 35.76 |

**Table S2** List of observation species and metrics.

| Species                                                                                   | Unit               | Temporal resolution | Metrics                   |
|-------------------------------------------------------------------------------------------|--------------------|---------------------|---------------------------|
| Gaseous pollutants                                                                        |                    |                     |                           |
| O <sub>3</sub>                                                                            | μg m <sup>-3</sup> | 1 h                 | Maximum daily 8 h average |
| SO <sub>2</sub>                                                                           | μg m <sup>-3</sup> | 1 h                 | Daily average             |
| NO <sub>2</sub>                                                                           | μg m <sup>-3</sup> | 1 h                 | Daily average             |
| PM <sub>2.5</sub> and its major components                                                |                    |                     |                           |
| PM <sub>2.5</sub>                                                                         | μg m <sup>-3</sup> | 1 h                 | Daily average             |
| SO <sub>4</sub> <sup>2-</sup> /NO <sub>3</sub> <sup>-</sup> /NH <sub>4</sub> <sup>+</sup> | μg m <sup>-3</sup> | 1 h                 | Daily average             |
| OC                                                                                        | μg m <sup>-3</sup> | 1 h                 | Daily average             |
| Meteorological variables                                                                  |                    |                     |                           |
| Temperature (T)                                                                           | ° C                | 1 h                 | Daily average             |
| Relative humidity (RH)                                                                    | %                  | 1 h                 | Daily average             |
| Wind speed (WS)                                                                           | m s <sup>-1</sup>  | 1 h                 | Daily average             |
| Wind direction (WD)                                                                       | m s <sup>-1</sup>  | 1 h                 | Daily average             |
| 24-h precipitation                                                                        | mm                 | 24 h                | Daily accumulated         |

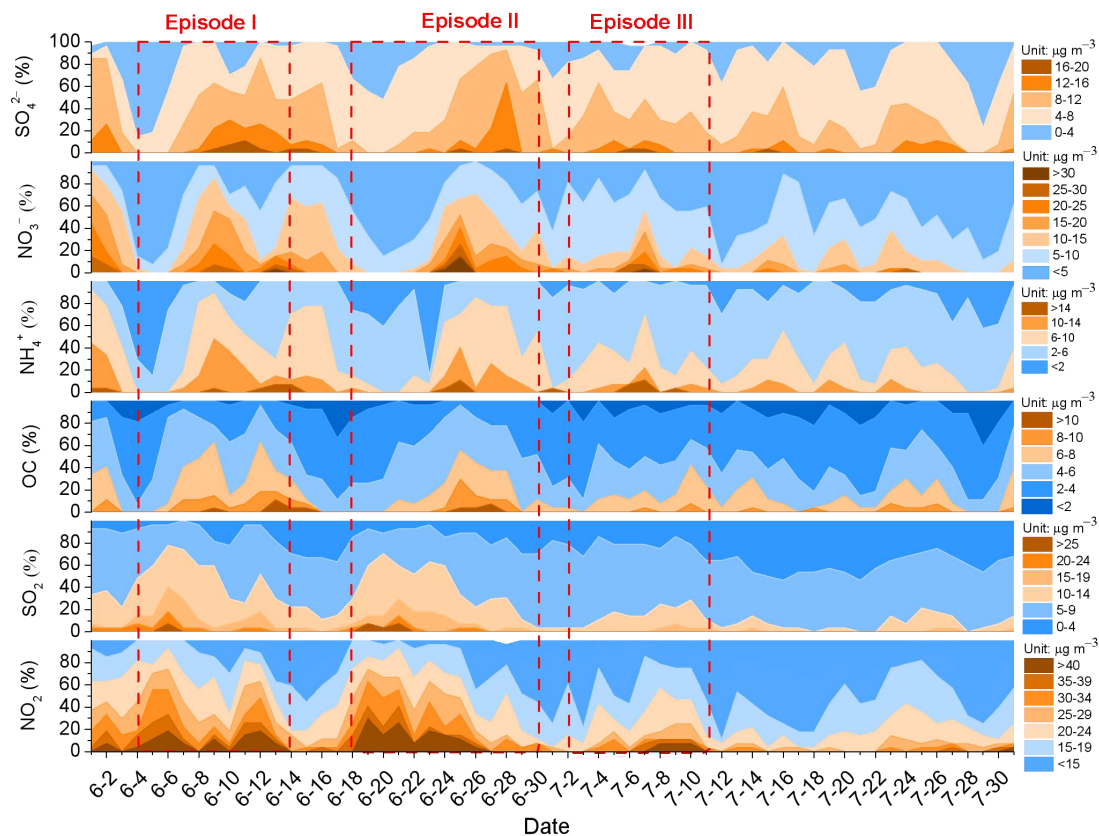

**Figure S1.** Occurrence frequency (%) of  $\text{SO}_4^{2-}$ ,  $\text{NO}_3^-$ ,  $\text{NH}_4^+$ , OC, and gaseous pollutants ( $\text{SO}_2$  and  $\text{NO}_2$ ) under different levels in the NCP from June 1 to July 31, 2021. The colour shading represented different categories classified by  $\text{SO}_4^{2-}$ ,  $\text{NO}_3^-$ ,  $\text{NH}_4^+$ , OC, and gaseous pollutants levels. Boxed areas delineated by red dashes represent three typical  $\text{PM}_{2.5}$  and  $\text{O}_3$  co-polluted episodes: June 4–14 (Episode I), June 18–29 (Episode II), and July 2–11 (Episode III), 2021.

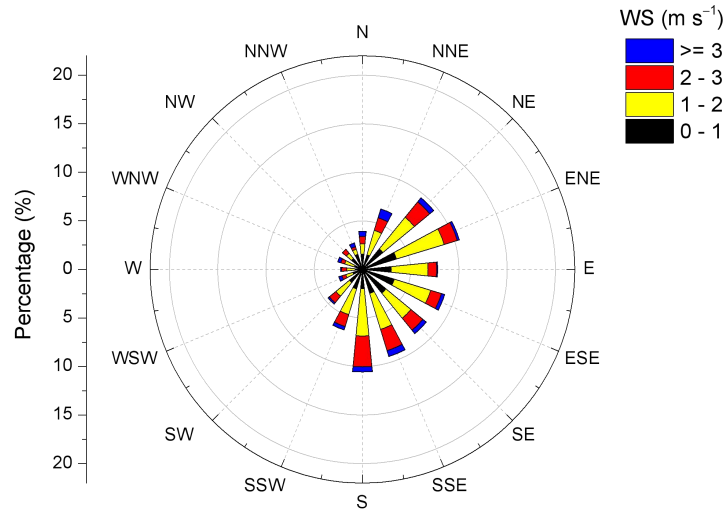

**Figure S2.** Overall WS and WD condition during the observation campaign.

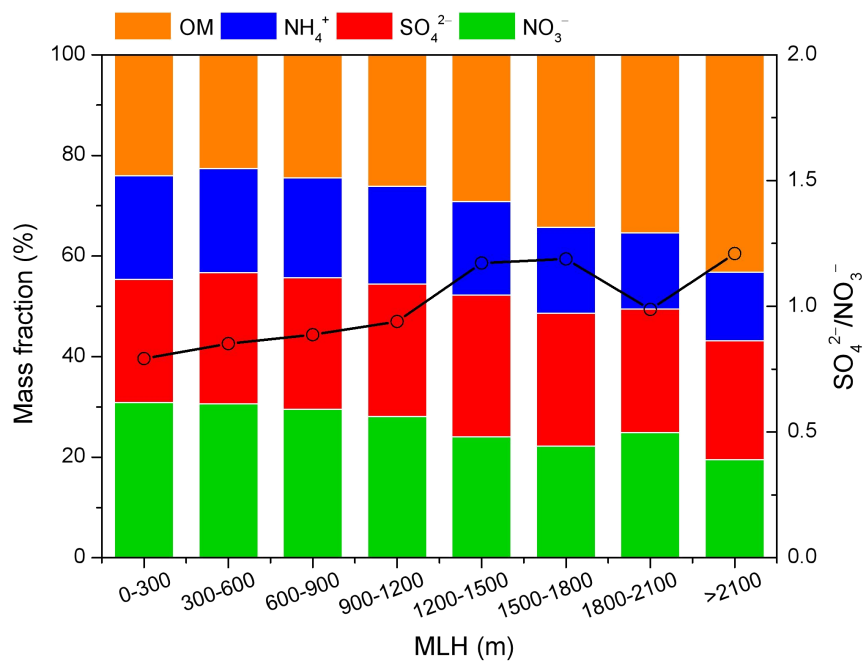

**Figure S3.** Mass fractions of major  $PM_{2.5}$  components and the mass ratio of  $SO_4^{2-}$  to  $NO_3^-$  in different MLH conditions.

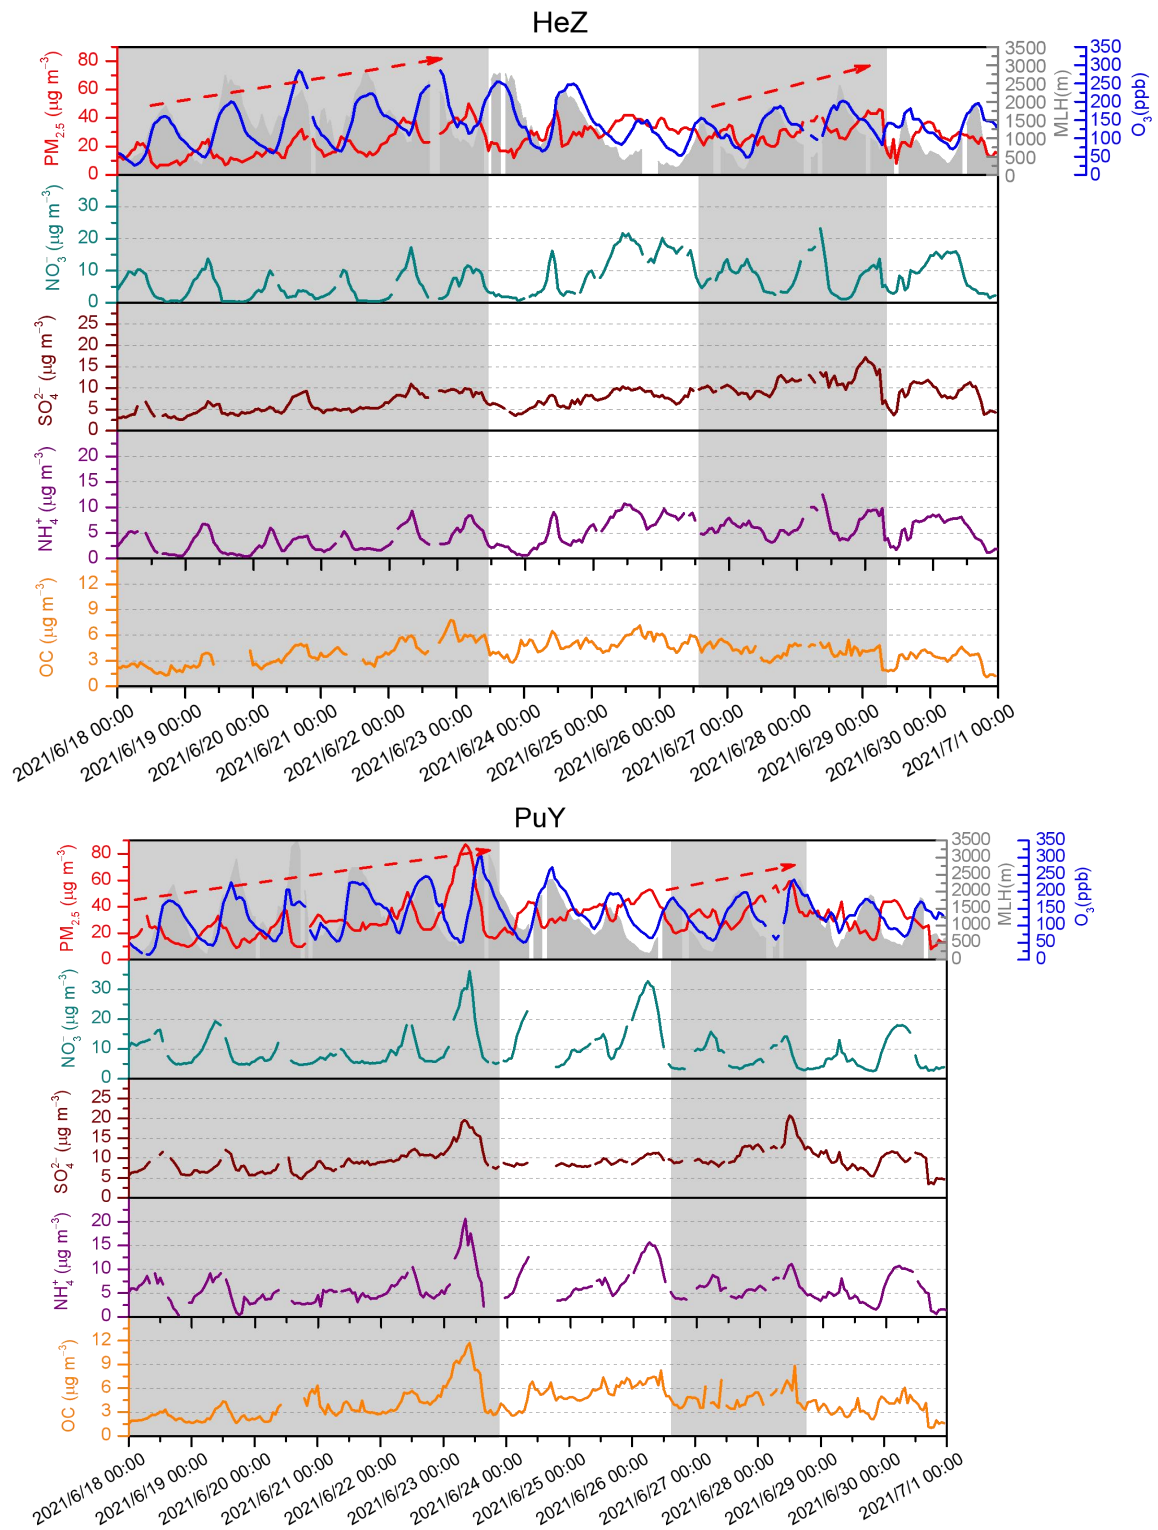

**Figure S4.** Hourly evolution of O<sub>3</sub>, PM<sub>2.5</sub>, its components and MLH in HeZ and PuY during June 18–29, 2021.

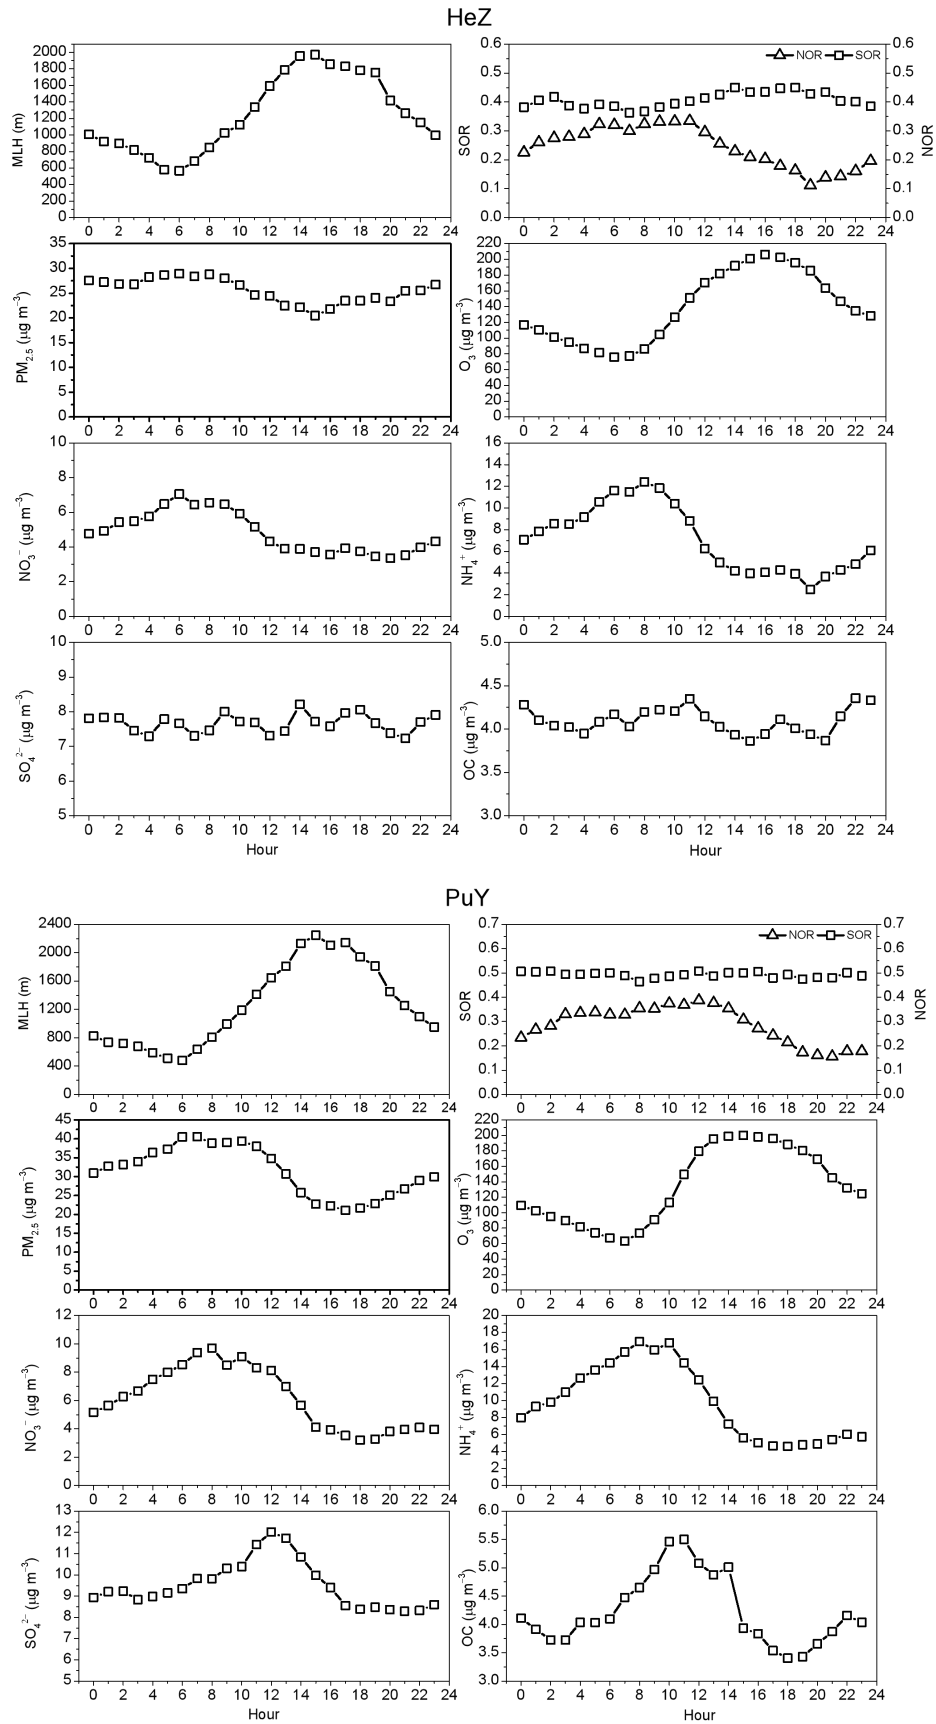

**Figure S5.** Diurnal variation of MLH, SOR, NOR,  $O_3$ ,  $PM_{2.5}$ , and its components in

HeZ and PuY during June 18-29, 2021.
